# Supplementary material
Source: PubMed Central journal article supplement (PMC5551039)
Supplement: NIHMS887346-supplement-Supplemental_Table.pdf [file NIHMS887346-supplement-Supplemental_Table.pdf]

**Supplemental Table 1.**

Multivariate analysis of BMI and BED effects\* on BP illness burden

| <b>Binary outcomes<sup>a</sup></b>      | <b>N</b> | <b>Effect</b> | <b>OR</b>       | <b>95% CI</b> |                | <b>p-value</b> |
|-----------------------------------------|----------|---------------|-----------------|---------------|----------------|----------------|
| <b>≥ 1Suicide attempt (Y/N)</b>         | 711      | BMI           | 1.026           | 1.004         | 1.049          | 0.0232         |
|                                         |          | BED           | 2.125           | 1.271         | 3.551          | 0.0040         |
| <b>Psychosis (Y/N)</b>                  | 709      | BMI           | 0.972           | 0.951         | 0.993          | 0.0098         |
|                                         |          | BED           | 2.180           | 1.285         | 3.663          | 0.0038         |
| <b>Ordinal outcome<sup>b</sup></b>      |          |               | <b>OR</b>       | <b>95% CI</b> |                | <b>p-value</b> |
| <b>Substance abuse comorbidity sum</b>  | 716      | BMI           | 0.986           | 0.967         | 1.005          | 0.1419         |
|                                         |          | BED           | 1.539           | 0.969         | 2.444          | 0.0681         |
| <b>Continuous outcomes<sup>c</sup></b>  |          |               | <b>Estimate</b> | <b>St Err</b> | <b>t-Value</b> | <b>p-value</b> |
| <b>Mood instability sum</b>             | 561      | BMI           | 0.0046          | 0.0084        | 0.54           | 0.5903         |
|                                         |          | BED           | 0.4296          | 0.2052        | 2.09           | 0.0368         |
| <b>Anxiety disorder comorbidity sum</b> | 715      | BMI           | 0.0022          | 0.0078        | 0.29           | 0.7748         |
|                                         |          | BED           | 0.9012          | 0.1888        | 4.77           | <0.0001        |
| <b>CIRS</b>                             | 636      | BMI           | 0.0786          | 0.0197        | 3.98           | <0.0001        |
|                                         |          | BED           | 0.7050          | 0.4847        | 1.45           | 0.1463         |

\*Quadratic terms for BMI, and interactions between BMI and BED were also explored for each outcome, but none were included in the above models due to non-significance (p-values>0.05)

<sup>a</sup> Logistic regression

<sup>b</sup> Ordinal logistic regression

<sup>c</sup> Linear regression
